# Supplementary material
Source: PubMed Central journal article supplement (PMC2864711)

### Mitochondria

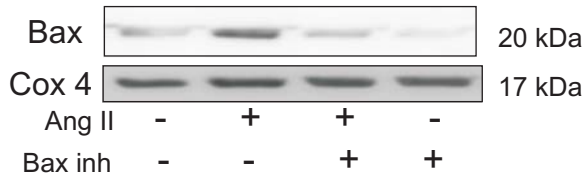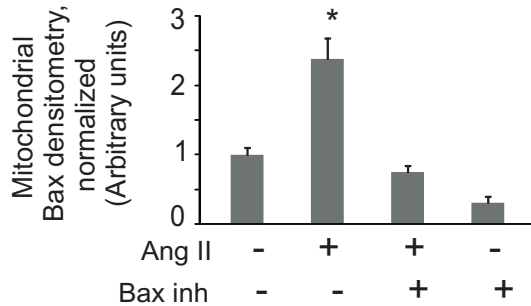

### Cytoplasm

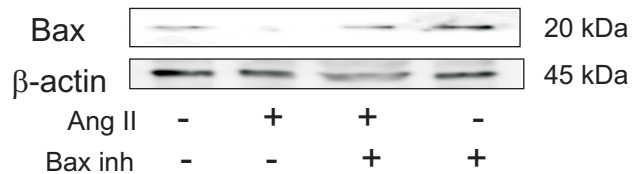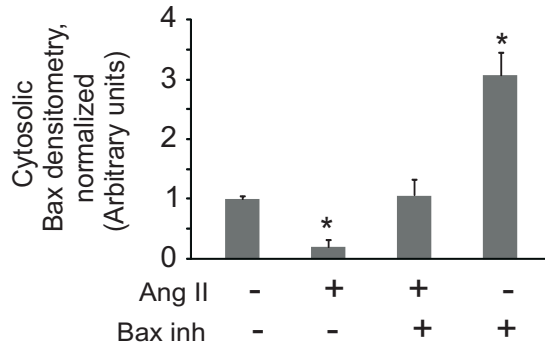

Supplement: supp_123_10_1634__1.pdf [file supp_123_10_1634__1.pdf]

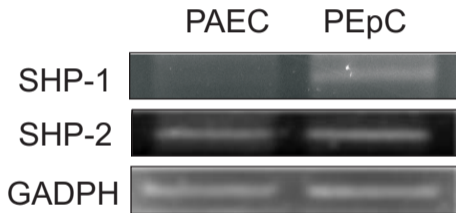

Supplement: supp_123_10_1634__3.pdf [file supp_123_10_1634__3.pdf]
